# Supplementary material for: Can Leukocyte Count Predict the Presence of Post-traumatic Lesions on the Wbct in Clinically Stable Severe Trauma Patients ? A Retrospective Study
Source: Research Square preprint supplement (doi:10.21203/rs.3.rs-6706216/v1), 2025-06-02
Supplement: Supplementary file 1 [file 3637d951c551095297638154.docx]

| **Location of post-traumatic injury** | **n = 301** |
| --- | --- |
| Spine | 103 (34%) |
| Pulmonary contusion | 89 (30%) |
| > 3 ribs | 83 (28%) |
| Skull fracture | 59 (20%) |
| Pneumothorax | 58 (19%) |
| Pelvic fracture | 50 (17%) |
| Subarachnoid hemorrhage | 23 (8%) |
| Vascular lesion | 21 (7%) |
| Hemothorax | 19 (6%) |
| Liver damage | 14 (5%) |
| Subdural hematoma | 11 (4%) |
| Intra-cerebral hematoma | 10 (3%) |
| Splenic damage | 9 (3%) |
| Renal damage | 7 (2%) |
| Colon damage | 6 (2%) |
| Diaphragmatic rupture | 1 (0.3%) |
| Extra-dural hematoma | 1 (0.3%) |
| Pancreatic damage | 1 (0.3%) |
